# Supplementary material for: A Cross-Cultural Study of Distress during COVID-19 Pandemic: Some Protective and Risk Factors
Source: MDPI journal article supplement (doi:10.3390/ijerph18147261), 2021-07-07
Supplement: s1 [file s1]

## Supplements

Table S1. Principal Component Analysis and Component Loadings of the

| Items of the COVID-19 fear scale                                                    | PC1 |
|-------------------------------------------------------------------------------------|-----|
| I am afraid that I might get the Coronavirus.                                       | .85 |
| I am afraid that I may end up in intensive care because of COVID-19.                | .84 |
| I am afraid that I might die if I get the Coronavirus infection.                    | .79 |
| I am afraid that a loved one might get the Coronavirus infection.                   | .83 |
| I am afraid that someone in my family might end up in hospital because of COVID-19. | .85 |
